# Supplementary material for: The influence of the urban food environment on diet, nutrition and health outcomes in low-income and middle-income countries: a systematic review
Source: PubMed Central journal article supplement — BMJ Glob Health. 2021 Oct 10;6(10):e006358. doi: 10.1136/bmjgh-2021-006358 (PMC8506857; doi:10.1136/bmjgh-2021-006358), 2021-10-10
Supplement: bmjgh-2021-006358supp001.pdf [file bmjgh-2021-006358supp001.pdf]

**Supplementary Table 1: Search strategy, Ovid MEDLINE**

|                                                                                                                                                                                                                                                                                                                                                                                                                                                                                                                                                                                                                                                                                                                                                                                                                                                                                                                                                                                                                                                                                                                                                                                                                                                                                                                                                                                                                                                                                                                                                                                                                                                                                                                                                                                                                                                                                                                                                                                                                                                                                                       | <b>Results</b> |
|-------------------------------------------------------------------------------------------------------------------------------------------------------------------------------------------------------------------------------------------------------------------------------------------------------------------------------------------------------------------------------------------------------------------------------------------------------------------------------------------------------------------------------------------------------------------------------------------------------------------------------------------------------------------------------------------------------------------------------------------------------------------------------------------------------------------------------------------------------------------------------------------------------------------------------------------------------------------------------------------------------------------------------------------------------------------------------------------------------------------------------------------------------------------------------------------------------------------------------------------------------------------------------------------------------------------------------------------------------------------------------------------------------------------------------------------------------------------------------------------------------------------------------------------------------------------------------------------------------------------------------------------------------------------------------------------------------------------------------------------------------------------------------------------------------------------------------------------------------------------------------------------------------------------------------------------------------------------------------------------------------------------------------------------------------------------------------------------------------|----------------|
| <b>1</b> (Afghanistan or Benin or {Burkina Faso} or Burundi or {Central African Republic} or Chad or Comoros or {Democratic Republic of Congo} or Eritrea or Ethiopia or Gambia or Guinea or {Guinea Bissau} or Haiti or Liberia or Madagascar or Malawi or Mali or Mozambique or Nepal or Niger or Rwanda or Senegal or {Sierra Leone} or Somalia or {South Sudan} or Tanzania or Togo or Uganda or Zimbabwe or Angola or Armenia or Bangladesh or Bhutan or Bolivia or {Cabo Verde} or Cambodia or Cameroon or Congo or Djibouti or Egypt or {Ivory Coast} or {Cote d ivoire} or {El Salvador} or Georgia or Ghana or Guatemala or Honduras or India or Indonesia or Jordan or Kenya or Kiribati or Kosovo or {Kyrgyz Republic} or Lao or Lesotho or Mauritania or Micronesia or Moldova or Mongolia or Morocco or Myanmar or Nicaragua or Nigeria or Pakistan or {Papua New Guinea} or Philippines or {Sao Tome Principe} or {Solomon Islands} or {Sri Lanka} or Sudan or Swaziland or Eswatini or {Syrian Arab Republic} or Syria or Tajikistan or {Timor Leste} or Tunisia or Ukraine or Uzbekistan or Vanuatu or Vietnam or {West Bank Gaza} or Yemen or Zambia or Albania or Algeria or {American Samoa} or Argentina or Azerbaijan or Belarus or Belize or Bosnia or Bosnia or Herzegovina or Botswana or Brazil or Bulgaria or China or Colombia or {Costa Rica} or Cuba or Dominica or {Dominican Republic} or Ecuador or {Equatorial Guinea} or Fiji or Gabon or Grenada or Guyana or Iran or Iraq or Jamaica or Kazakhstan or Lebanon or Libya or Macedonia or FYR or FYROM or Malaysia or {Marshall Islands} or Mexico or Montenegro or Namibia or Nauru or Panama or Paraguay or Peru or {Russian Federation} or Russia or Samoa or Serbia or {South Africa} or {St Lucia} or {St Vincent the Grenadines} or Suriname or Thailand or Tonga or Turkey or Turkmenistan or Tuvalu or Venezuela).mp. [mp=title, abstract, heading word, drug trade name, original title, device manufacturer, drug manufacturer, device trade name, keyword, floating subheading word, candidate term word] | 95303          |
| <b>2</b> (LIC* or {low income econom*} or {low* income countr*} or LMIC* or {low middle income countr*} or {upper middle income econom*} or {upper middle income countr*} or {developing countr*} or {developing econom*} or {developing world countr*} or {global south}).mp. [mp=title, abstract, heading word, drug trade name, original title, device manufacturer, drug manufacturer, device trade name, keyword, floating subheading word, candidate term word]                                                                                                                                                                                                                                                                                                                                                                                                                                                                                                                                                                                                                                                                                                                                                                                                                                                                                                                                                                                                                                                                                                                                                                                                                                                                                                                                                                                                                                                                                                                                                                                                                                 | 229516         |
| <b>3</b> Developing Countries/                                                                                                                                                                                                                                                                                                                                                                                                                                                                                                                                                                                                                                                                                                                                                                                                                                                                                                                                                                                                                                                                                                                                                                                                                                                                                                                                                                                                                                                                                                                                                                                                                                                                                                                                                                                                                                                                                                                                                                                                                                                                        | 77387          |
| <b>4</b> Poverty Areas/ or slum*.mp.                                                                                                                                                                                                                                                                                                                                                                                                                                                                                                                                                                                                                                                                                                                                                                                                                                                                                                                                                                                                                                                                                                                                                                                                                                                                                                                                                                                                                                                                                                                                                                                                                                                                                                                                                                                                                                                                                                                                                                                                                                                                  | 8253           |
| <b>5</b> ({Food Environment*} or {Food desert*} or {Food swamp*} or {Foodscape*} or {Obesogenic environment*} or {Nutrition* environment*}).mp. [mp=title, abstract, heading word, drug trade name, original title, device manufacturer, drug manufacturer, device trade name, keyword, floating subheading word, candidate term word]                                                                                                                                                                                                                                                                                                                                                                                                                                                                                                                                                                                                                                                                                                                                                                                                                                                                                                                                                                                                                                                                                                                                                                                                                                                                                                                                                                                                                                                                                                                                                                                                                                                                                                                                                                | 4249           |
| <b>6</b> 1 or 2 or 3 or 4                                                                                                                                                                                                                                                                                                                                                                                                                                                                                                                                                                                                                                                                                                                                                                                                                                                                                                                                                                                                                                                                                                                                                                                                                                                                                                                                                                                                                                                                                                                                                                                                                                                                                                                                                                                                                                                                                                                                                                                                                                                                             | 327302         |
| <b>7</b> 5 and 6                                                                                                                                                                                                                                                                                                                                                                                                                                                                                                                                                                                                                                                                                                                                                                                                                                                                                                                                                                                                                                                                                                                                                                                                                                                                                                                                                                                                                                                                                                                                                                                                                                                                                                                                                                                                                                                                                                                                                                                                                                                                                      | 214            |
| <b>8</b> limit 7 to yr="2000 - 2020"                                                                                                                                                                                                                                                                                                                                                                                                                                                                                                                                                                                                                                                                                                                                                                                                                                                                                                                                                                                                                                                                                                                                                                                                                                                                                                                                                                                                                                                                                                                                                                                                                                                                                                                                                                                                                                                                                                                                                                                                                                                                  | 195            |

**Supplementary Table 2: Quality appraisal – National Heart, Lung and Blood Institute (NHLBI) checklists****NHLBI Checklist: Cross Sectional and Cohort Studies<sup>1</sup>**

| Article               | Score | Q1 | Q2 | Q3  | Q4 | Q5 | Q6  | Q7  | Q8  | Q9 | Q10 | Q11 | Q12 | Q13 | Q14 |
|-----------------------|-------|----|----|-----|----|----|-----|-----|-----|----|-----|-----|-----|-----|-----|
| Alves, 2019           | Fair  | Y  | Y  | N/R | Y  | N  | N/A | N/A | Y   | N  | N/A | C/D | N/A | N/A | Y   |
| Assis, 2019           | Good  | Y  | Y  | Y   | Y  | Y  | N/A | N/A | Y   | Y  | N/A | Y   | N/A | N/A | Y   |
| Azeredo, 2016         | Good  | Y  | Y  | Y   | Y  | N  | N/A | N/A | N/A | Y  | N/A | Y   | N/A | N/A | Y   |
| Backes, 2019          | Good  | Y  | Y  | Y   | Y  | Y  | N/A | N/A | Y   | Y  | N/A | Y   | N/A | N/A | Y   |
| Barrera, 2016         | Good  | Y  | Y  | N   | N  | N  | N/A | N/A | Y   | Y  | N/A | Y   | N/A | N/A | Y   |
| Bekker, 2017          | Fair  | Y  | Y  | N/R | Y  | N  | N/A | N/A | N/A | Y  | N/A | Y   | N/A | N/A | N   |
| Camargo, 2019         | Poor  | Y  | N  | N/R | Y  | N  | N/A | N/A | Y   | Y  | N/A | Y   | N/A | N/A | Y   |
| Charoenbut, 2018      | Good  | Y  | Y  | Y   | Y  | Y  | N/A | N/A | Y   | Y  | N/A | Y   | N/A | N/A | Y   |
| Chor 2016             | Good  | Y  | Y  | Y   | Y  | Y  | N/A | N/A | N   | Y  | N/A | Y   | N/A | N/A | Y   |
| Corrêa, 2018          | Good  | Y  | Y  | Y   | Y  | Y  | N/A | N/A | Y   | Y  | N/A | Y   | N/A | N/A | Y   |
| Cunningham-Myrie,2020 | Good  | Y  | Y  | Y   | Y  | Y  | N/A | N/A | Y   | Y  | N/A | Y   | N/A | N/A | Y   |
| Curioni, 2020         | Good  | Y  | Y  | Y   | Y  | N  | N/A | N/A | N   | Y  | N/A | Y   | N/A | N/A | Y   |
| Dake, 2016            | Good  | Y  | Y  | N/R | Y  | N  | N/A | N/A | Y   | Y  | N/A | Y   | N/A | N/A | Y   |
| Darfour-Oduro, 2020   | Good  | Y  | Y  | Y   | Y  | N  | N/A | N/A | N/A | Y  | Y   | Y   | N/A | N/A | Y   |
| Da Silva              | Good  | Y  | Y  | Y   | N  | Y  | N/A | N/A | N/A | Y  | N/A | Y   | N/A | N/A | Y   |
| deFreitas, 2019       | Fair  | Y  | Y  | N/R | Y  | N  | N/A | N/A | N/A | Y  | N/A | Y   | N/A | N/A | Y   |
| Duran, 2015           | Good  | Y  | Y  | Y   | Y  | N  | N/A | N/A | Y   | Y  | N/A | Y   | N/A | N/A | Y   |
| Fernandes, 2017       | Fair  | Y  | Y  | N/R | Y  | N  | N   | N/A | Y   | Y  | N/A | Y   | N/A | N/A | Y   |
| Goncalves, 2019       | Fair  | Y  | Y  | Y   | Y  | Y  | N/A | N/A | N/A | N  | N/A | Y   | N/A | N/A | Y   |
| Goryakin, 2015        | Good  | Y  | Y  | N   | N  | N  | N/A | N/A | Y   | Y  | N/A | Y   | N/A | N/A | Y   |
| Guo, 2018             | Good  | Y  | Y  | N/R | Y  | N  | N/A | N/A | Y   | Y  | N/A | Y   | N/A | N/A | Y   |
| Guo, 2019             | Good  | Y  | Y  | N/R | Y  | N  | N/A | N/A | Y   | Y  | Y   | Y   | N/A | N/A | Y   |
| Hall, 2020            | Good  | Y  | Y  | N/R | Y  | N  | N/A | N/A | Y   | Y  | N/A | Y   | N/A | N/A | Y   |
| Hua, 2014             | Poor  | Y  | Y  | N/R | Y  | N  | N/A | N/A | Y   | Y  | N/A | C/D | N/A | N/A | N   |
| Jaime, 2011           | Good  | Y  | Y  | Y   | Y  | Y  | N/A | N/A | Y   | Y  | N/A | C/D | N/A | N/A | Y   |
| Kelly, 2014           | Poor  | Y  | Y  | N   | Y  | N  | Y   | N/A | C/D | Y  | N/A | Y   | N/A | N/A | N   |

|                             |      |   |   |     |     |   |     |     |     |     |     |   |     |     |   |
|-----------------------------|------|---|---|-----|-----|---|-----|-----|-----|-----|-----|---|-----|-----|---|
| Kivuyo, 2020                | Good | Y | Y | Y   | C/D | Y | N/A | N/A | Y   | Y   | N/A | Y | N/A | N/A | Y |
| Kroll, 2019                 | Fair | Y | Y | Y   | Y   | N | N/A | N/A | N   | Y   | N/A | Y | N/A | N/A | N |
| Leite, 2017                 | Good | Y | Y | Y   | Y   | Y | N/A | N/A | Y   | Y   | N/A | Y | N/A | N/A | Y |
| Leme, 2017                  | Good | Y | Y | Y   | Y   | Y | N/A | N/A | Y   | Y   | N/A | Y | N/A | N/A | Y |
| Li, 2011                    | Good | Y | Y | Y   | Y   | N | N/A | N/A | N/A | Y   | N/A | Y | N/A | N/A | Y |
| Liu, 2014                   | Poor | Y | N | N/R | N/A | N | C/D | N/A | Y   | C/D | N/A | Y | N/A | N/A | Y |
| Liu, 2020                   | Good | Y | Y | Y   | Y   | Y | N/A | N/A | Y   | Y   | N/A | Y | N/A | N/A | Y |
| Machado, 2017               | Good | Y | Y | C/D | Y   | N | N/A | N/A | Y   | Y   | N/A | Y | N/A | N/A | Y |
| Matozinhos, 2015            | Good | Y | Y | Y   | Y   | N | N/A | N/A | Y   | Y   | N/A | Y | N/A | N/A | Y |
| Mendes, 2013                | Good | Y | Y | Y   | Y   | N | N/A | N/A | N/A | C/D | N/A | Y | N/A | N/A | Y |
| Mendonça, 2019              | Good | Y | Y | Y   | Y   | N | N/A | N/A | Y   | Y   | N/A | Y | N/A | N/A | Y |
| Menezes, 2018               | Fair | Y | Y | Y   | Y   | N | N/A | N/A | Y   | C/D | N/A | Y | N/A | N/A | N |
| Menezes, 2018               | Good | Y | Y | Y   | Y   | N | N/A | N/A | Y   | Y   | N/A | Y | N/A | N/A | Y |
| Miller, 2016                | Good | Y | Y | Y   | Y   | N | N/A | N/A | Y   | Y   | N/A | Y | N/A | N/A | Y |
| Nogueira, 2018              | Good | Y | Y | Y   | Y   | Y | N/A | N/A | N/A | Y   | N/A | Y | N/A | N/A | Y |
| Nogueira, Luana Romao, 2020 | Good | Y | Y | Y   | Y   | Y | N/A | N/A | N   | Y   | N/A | Y | N/A | N/A | Y |
| Norbu, 2019                 | Poor | Y | N | N/R | Y   | N | N/A | N/A | C/D | C/D | N/A | Y | N/A | N/A | N |
| Ochoa-Meza, 2017            | Good | Y | Y |     | Y   | Y | N/A | N/A | Y   | Y   | N/A | Y | N/A | N/A | Y |
| Oyeyemi, 2012               | Good | Y | Y | Y   | Y   | N | N/A | N/A | N   | Y   | N/A | Y | N/A | N/A | Y |
| Patel, 2018                 | Good | Y | Y | Y   | N/R | N | N/A | N/A | Y   | Y   | N/A | Y | N/A | N/A | Y |
| Pessoa, 2015                | Good | Y | Y | Y   | Y   | Y | N/A | N/A | N   | Y   | N/A | Y | N/A | N/A | Y |
| Rossi, 2018                 | Fair | Y | Y | Y   | Y   | N | N/A | N/A | N   | C/D | N/A | Y | N/A | N/A | Y |
| Seto, 2019                  | Fair | Y | Y | C/D | Y   | N | N/A | Y   | Y   | Y   | Y   | Y | N/R | Y   | Y |
| Trinh, 2020                 | Fair | Y | N | N/R | N/R | N | N/A | N/A | Y   | Y   | N/A | Y | N/A | N/A | Y |
| Vedovato, 2015              | Good | Y | Y | Y   | Y   | Y | N/A | N/A | N   | Y   | N/A | Y | N/A | N/A | Y |
| Velasquez-Melendez, 2013    | Good | Y | Y | Y   | Y   | N | N/A | N/A | N   | Y   | N/A | Y | N/A | N/A | Y |
| Wang, 2012                  | Fair | Y | Y | Y   | Y   | N | C/D | Y   | Y   | Y   | Y   | Y | N/R | N   | Y |
| Watson, 2013                | Fair | Y | Y | N   | Y   | N | N/A | N/A | N   | Y   | N/A | Y | N/A | N/A | Y |
| Wertheim-Heck, 2019         | Good | Y | Y | Y   | Y   | Y | N/A | N/A | N/A | Y   | N   | Y | NA  | N/A | Y |
| Widiyanto, 2018             | Fair | Y | Y | Y   | Y   | N | N/A | N/A | N   | N   | N/A | Y | N/A | N/A | Y |

|                       |      |   |     |     |     |   |     |     |   |     |     |   |     |     |     |
|-----------------------|------|---|-----|-----|-----|---|-----|-----|---|-----|-----|---|-----|-----|-----|
| Wijnhoven, 2014       | Good | Y | Y   | Y   | Y   | Y | N/A | N/A | Y | Y   | N/A | Y | N/A | N/A | N   |
| Xu, 2013              | Fair | Y | Y   | Y   | Y   | N | Y   | Y   | Y | C/D | Y   | Y | N/A | N   | Y   |
| Yazdi-Feyzabadi, 2017 | Good | Y | Y   | Y   | Y   | N | N/A | N/A | Y | Y   | N/A | Y | N/A | N/A | Y   |
| Zhang, 2012           | Fair | Y | Y   | Y   | Y   | N | N/A | N/A | N | Y   | N/A | Y | N/A | N/A | N   |
| Zhang, 2016           | Poor | Y | Y   | N/R | Y   | N | N/A | N/A | Y | Y   | N/A | Y | N/A | N/A | C/D |
| Zhang, 2020           | Good | Y | Y   | Y   | N   | N | N/A | N/A | Y | Y   | N/A | Y | N/A | N/A | Y   |
| Zheng, 2013           | Poor | Y | C/D | C/D | C/D | N | N/A | N/A | Y | N   | N/A | Y | N/A | N/A | N   |
| Zhou, 2017            | Good | Y | Y   | Y   | Y   | N | N/A | N/A | Y | Y   | N/A | Y | N/A | N/A | Y   |
| Zhou, 2020            | Good | Y | Y   | Y   | Y   | N | N/A | N/A | Y | Y   | N/A | Y | N/A | N/A | Y   |
| Zuccolotto, 2015      | Fair | Y | Y   | Y   | Y   | Y | N/A | N/A | N | N   | N/A | Y | N/A | N/A | Y   |

**<sup>1</sup>NHBLI Checklist: observational and cohort studies** (1. Was the research question or objective in this paper clearly stated? 2. Was the study population clearly specified and defined? 3. Was the participation rate of eligible persons at least 50%? 4. Were all the subjects selected or recruited from the same or similar populations (including the same time period)? Were inclusion and exclusion criteria for being in the study pre-specified and applied uniformly to all participants? 5. Was a sample size justification, power description, or variance and effect estimates provided? 6. For the analyses in this paper, were the exposure(s) of interest measured prior to the outcome(s) being measured? 7. Was the timeframe sufficient so that one could reasonably expect to see an association between exposure and outcome if it existed? 8. For exposures that can vary in amount or level, did the study examine different levels of the exposure as related to the outcome (e.g., categories of exposure, or exposure measured as continuous variable)? 9. Were the exposure measures (independent variables) clearly defined, valid, reliable, and implemented consistently across all study participants? 10. Was the exposure(s) assessed more than once over time? 11. Were the outcome measures (dependent variables) clearly defined, valid, reliable, and implemented consistently across all study participants? 12. Were the outcome assessors blinded to the exposure status of participants? 13. Was loss to follow-up after baseline 20% or less? 14. Were key potential confounding variables measured and adjusted statistically for their impact on the relationship between exposure(s) and outcome(s)?). **Abbreviations:** C/D, cannot determine; N, no; N/A, not applicable; N/R, not reported; Y, yes.

### NHLBI Checklist: Case-control studies<sup>2</sup>

| Article             | Score | Q1 | Q2 | Q3 | Q4 | Q5  | Q6 | Q7  | Q8 | Q9 | Q10 | Q11 | Q12 |
|---------------------|-------|----|----|----|----|-----|----|-----|----|----|-----|-----|-----|
| Setiyaningsih, 2019 | Poor  | Y  | N  | N  | N  | N/R | Y  | N/R | Y  | N  | N   | N/R | Y   |

**<sup>2</sup>NHBLI Checklist: case-control studies** (1. Was the research question or objective in this paper clearly stated and appropriate? 2. Was the study population clearly specified and defined? 3. Did the authors include a sample size justification? 4. Were controls selected or recruited from the same or similar population that gave rise to the cases (including the same timeframe)? 5. Were the definitions, inclusion and exclusion criteria, algorithms or processes used to identify or select cases and controls valid, reliable, and implemented consistently across all study participants? 6. Were the cases clearly defined and differentiated from controls? 7. If less than 100 percent of eligible cases and/or controls were selected for the study, were the cases and/or controls randomly selected from those eligible? 8. Was there use of concurrent controls? 9. Were the investigators able to confirm that the exposure/risk occurred prior to the development of the condition or event that defined a participant as a case? 10. Were the measures of exposure/risk clearly defined, valid, reliable, and implemented consistently (including the same time period) across all study participants? 11. Were the assessors of exposure/risk blinded to the case or control status of participants? 12. Were key potential confounding variables measured and adjusted statistically in the analyses? If matching was used, did the investigators account for matching during study analysis? **Abbreviations:** C/D, cannot determine; N, no; N/A, not applicable; N/R, not reported; Y, yes.

**NHLBI Checklist: Controlled intervention studies<sup>3</sup>**

| Article                  | Score | Q1 | Q2  | Q3  | Q4 | Q5  | Q6  | Q7  | Q8  | Q9  | Q10 | Q11 | Q12 | Q13 | Q14 |
|--------------------------|-------|----|-----|-----|----|-----|-----|-----|-----|-----|-----|-----|-----|-----|-----|
| Aghdam, 2018             | Poor  | Y  | C/D | N/R | N  | N   | N   | C/D | Y   | Y   | N/R | Y   | N/R | C/D | Y   |
| Bandoni, 2011            | Fair  | Y  | C/D | N/R | N  | N/R | Y   | Y   | Y   | N/R | N/R | Y   | Y   | N/R | Y   |
| Bonvecchio-Arenas, 2010* | Poor  | Y  | C/D | N/R | CD | N/R | C/D |
| Chawla, 2017             | Fair  | Y  | C/D | N/R | N  | N   | Y   | N   | N   | N/R | Y   | Y   | C/D | N/R | Y   |
| Safdie, 2013             | Fair  | Y  | C/D | N/R | N  | N/R | N   | C/D | C/D | Y   | Y   | Y   | Y   | C/D | Y   |
| Shamah Levy, 2012        | Fair  | Y  | C/D | N/R | N  | Y   | N   | Y   | Y   | Y   | N/R | Y   | N   | Y   | Y   |
| Steyn, 2015              | Poor  | Y  | C/D | N/R | N  | N/R | N/R | Y   | Y   | N/R | N/R | Y   | N   | N/R | Y   |
| Yazdi-Feyzabadi, 2018    | Poor  | N  | C/D | N/R | N  | N/R | N/R | N/A | N/A | N   | N   | Y   | Y   | Y   | N   |

<sup>3</sup>**NHLBI Checklist: controlled intervention studies** (1. Was the study described as randomized, a randomized trial, a randomized clinical trial, or an RCT? 2. Was the method of randomization adequate (i.e., use of randomly generated assignment)? 3. Was the treatment allocation concealed (so that assignments could not be predicted)? 4. Were study participants and providers blinded to treatment group assignment? 5. Were the people assessing the outcomes blinded to the participants' group assignments? 6. Were the groups similar at baseline on important characteristics that could affect outcomes (e.g., demographics, risk factors, co-morbid conditions)? 7. Was the overall drop-out rate from the study at endpoint 20% or lower of the number allocated to treatment? 8. Was the differential drop-out rate (between treatment groups) at endpoint 15 percentage points or lower? 9. Was there high adherence to the intervention protocols for each treatment group? 10. Were other interventions avoided or similar in the groups (e.g., similar background treatments)? 11. Were outcomes assessed using valid and reliable measures, implemented consistently across all study participants? 12. Did the authors report that the sample size was sufficiently large to be able to detect a difference in the main outcome between groups with at least 80% power? 13. Were outcomes reported or subgroups analysed pre-specified (i.e., identified before analyses were conducted)? 14. Were all randomized participants analysed in the group to which they were originally assigned, i.e., did they use an intention-to-treat analysis?). **Abbreviations:** C/D, cannot determine; N, no; N/A, not applicable; N/R, not reported; Y, yes.

\*Note this study is a second report of the study reported in Safdie, 2013. These are counted as one study in the narrative synthesis and awarded a “fair” based on quality appraisal of Safdie 2013.

**Supplementary Table 3: Excluded articles from full-text screening**

|     |                                                                                                                                                                                                                                                                                                                                                                                                                                                                                                                                                                             |
|-----|-----------------------------------------------------------------------------------------------------------------------------------------------------------------------------------------------------------------------------------------------------------------------------------------------------------------------------------------------------------------------------------------------------------------------------------------------------------------------------------------------------------------------------------------------------------------------------|
| 1.  | Almeida LB, Scagliusi FB, Duran AC, et al. Barriers to and facilitators of ultra-processed food consumption: perceptions of Brazilian adults. <i>Public health nutrition</i> 2018;21(1):68-76. doi: <a href="https://dx.doi.org/10.1017/S1368980017001665">https://dx.doi.org/10.1017/S1368980017001665</a>                                                                                                                                                                                                                                                                 |
| 2.  | Anggraini R, Februhartanty J, Bardosono S, et al. Food Store Choice Among Urban Slum Women Is Associated With Consumption of Energy-Dense Food. <i>Asia-Pacific journal of public health</i> 2016;28(5):458-68. doi: <a href="https://dx.doi.org/10.1177/1010539516646849">https://dx.doi.org/10.1177/1010539516646849</a>                                                                                                                                                                                                                                                  |
| 3.  | Anzo A, Klassen-Wigger P, Luna-Carrasco J, et al. Impact of a digital facebook campaign on the purchase and consumption of food in Mexican families with children under 12 years: A social marketing strategy. <i>Annals of Nutrition and Metabolism</i> 2017;71(Supplement 2):331-32. doi: <a href="http://dx.doi.org/10.1159/000480486">http://dx.doi.org/10.1159/000480486</a>                                                                                                                                                                                           |
| 4.  | Arifin NA, Majid HA, Zainol R. The association of food outlets surrounding schools with obesity profiles among Malaysian adolescents. <i>Medical Journal of Malaysia</i> 2017;72(Supplement 1):86.                                                                                                                                                                                                                                                                                                                                                                          |
| 5.  | Athar P. The silent sheep revolution. <i>Rural 21</i> 2019;53(2):25-26.                                                                                                                                                                                                                                                                                                                                                                                                                                                                                                     |
| 6.  | Bae SG, Kim JY, Kim KY, et al. Changes in dietary behavior among adolescents and their association with government nutrition policies in Korea, 2005-2009. <i>Journal of Preventive Medicine &amp; Public Health</i> 2012;45(1):47-59. doi: 10.3961/jpmph.2012.45.1.47                                                                                                                                                                                                                                                                                                      |
| 7.  | Batis C, Rodriguez-Ramirez S, Ariza AC, et al. Intakes of Energy and Discretionary Food in Mexico Are Associated with the Context of Eating: Mealtime, Activity, and Place. <i>Journal of Nutrition</i> 2016;146(9):1907S-15S. doi: 10.3945/jn.115.219857                                                                                                                                                                                                                                                                                                                   |
| 8.  | Becker HV, Eaton JC, Iannotti LL. Changing food environments and health outcomes: Quantifying the nutrition transition in global nutrition research. <i>FASEB Journal</i> 2017;31(1 Supplement 1)                                                                                                                                                                                                                                                                                                                                                                           |
| 9.  | Beery M, Adatia R, Segantin O, et al. School food gardens: fertile ground for education. <i>Health Education (0965-4283)</i> 2014;114(4):281-92. doi: 10.1108/HE-05-2013-0019                                                                                                                                                                                                                                                                                                                                                                                               |
| 10. | Boonchoo W, Hayashi F, Takemi Y. Exploring the effect of dietary intake to weight status of preadolescents in urban setting using a new proposed food group classification-evidence from Thailand. <i>Annals of Nutrition and Metabolism</i> 2017;71(Supplement 2):740-41. doi: <a href="http://dx.doi.org/10.1159/000480486">http://dx.doi.org/10.1159/000480486</a>                                                                                                                                                                                                       |
| 11. | Boonchoo W, Takemi Y, Hayashi F, et al. Dietary intake and weight status of urban Thai preadolescents in the context of food environment. <i>Preventive Medicine Reports</i> 2017;8((Boonchoo, Takemi, Koiwai, Ogata) Graduate School of Nutrition Sciences, Kagawa Nutrition University, 3-9-21, Sakado, Saitama 350-0288, Japan(Boonchoo) Bureau of Nutrition, Department of Health, Ministry of Public Health, Nonthaburi 11000, Thailand(Hayash):153-57. doi: <a href="http://dx.doi.org/10.1016/j.pmedr.2017.09.009">http://dx.doi.org/10.1016/j.pmedr.2017.09.009</a> |
| 12. | Boone-Heinonen J, Diez-Roux A, Goff DC, et al. The neighborhood energy balance equation: Does food environment + physical activity environment = obesity? The cardia study. <i>Obesity</i> 2011;19(SUPPL. 1):S53. doi: <a href="http://dx.doi.org/10.1038/oby.2011.222">http://dx.doi.org/10.1038/oby.2011.222</a>                                                                                                                                                                                                                                                          |
| 13. | Bridle-Fitzpatrick S. Food deserts or food swamps?: A mixed-methods study of local food environments in a Mexican city. <i>Social Science &amp; Medicine</i> 2015;142:202-13. doi: 10.1016/j.socscimed.2015.08.010                                                                                                                                                                                                                                                                                                                                                          |
| 14. | Brown B, Noonan C, Nord M. Prevalence of food insecurity and health-associated outcomes and food characteristics of Northern Plains Indian households. <i>Journal of Hunger and Environmental Nutrition</i> 2007;1(4):37-53. doi: <a href="http://dx.doi.org/10.1300/J477v01n04_04">http://dx.doi.org/10.1300/J477v01n04_04</a>                                                                                                                                                                                                                                             |
| 15. | Cerdan CDC, Medina IPP, Salazar CSC, et al. Evaluation of the nutritional quality of refreshments and nutritional status of an elementary school student population in Veracruz, Mexico. <i>Nutricion Clinica Y Dietetica Hospitalaria</i> 2018;38(3):85-92. doi: 10.12873/383caballero                                                                                                                                                                                                                                                                                     |
| 16. | Choudhury S, Headey DD, Masters WA. First Foods: Diet Quality among Infants Aged 6-23 Months in 42 Countries. <i>Food Policy</i> 2019;88                                                                                                                                                                                                                                                                                                                                                                                                                                    |
| 17. | Cochrane T, Yu Y, Davey R, et al. Associations of built environment and proximity of food outlets with weight status: Analysis from 14 cities in 10 countries. <i>Preventive Medicine</i> 2019;129:N.PAG-N.PAG. doi: 10.1016/j.ympmed.2019.105874                                                                                                                                                                                                                                                                                                                           |

|                                                                                                                                                                                                                                                                                                                                                                                                                                                                                                                                                                                                                                                            |
|------------------------------------------------------------------------------------------------------------------------------------------------------------------------------------------------------------------------------------------------------------------------------------------------------------------------------------------------------------------------------------------------------------------------------------------------------------------------------------------------------------------------------------------------------------------------------------------------------------------------------------------------------------|
| 18. Colozza D, Avendano M. Urbanisation, dietary change and traditional food practices in Indonesia: A longitudinal analysis. <i>Social Science &amp; Medicine</i> 2019;233:103-12. doi: 10.1016/j.socscimed.2019.06.007                                                                                                                                                                                                                                                                                                                                                                                                                                   |
| 19. Corsi A, Englberger L, Flores R, et al. A participatory assessment of dietary patterns and food behavior in Pohnpei, Federated States of Micronesia. <i>Asia Pacific Journal of Clinical Nutrition</i> 2008;17(2):309-16.                                                                                                                                                                                                                                                                                                                                                                                                                              |
| 20. Dahinten SL, Castro LE, Zavatti JR, et al. Growth of school children in different urban environments in Argentina. <i>Annals of Human Biology</i> 2011;38(2):219-27. doi: 10.3109/03014460.2010.515949                                                                                                                                                                                                                                                                                                                                                                                                                                                 |
| 21. de Castro PCPJ, Nobre AA, de Castro IRR, et al. DOES CONTEXT INFLUENCE BRAZILIAN WORKERS' BODY MASS INDEX? RESULTS FROM THE ELSA-BRASIL STUDY BASELINE. <i>Annals of Nutrition &amp; Metabolism</i> 2017;71:319.                                                                                                                                                                                                                                                                                                                                                                                                                                       |
| 22. de Villiers A, Steyn NP, Draper CE, et al. Implementation of the HealthKick intervention in primary schools in low-income settings in the Western Cape Province, South Africa: a process evaluation. <i>BMC Public Health</i> 2015;15(1):818-18. doi: 10.1186/s12889-015-2157-8                                                                                                                                                                                                                                                                                                                                                                        |
| 23. Debela BL, Demmler KM, Klasen S, et al. Supermarket food purchases and child nutrition in Kenya. <i>Global Food Security</i> 2020;25(Department of Agricultural Economics and Rural Development, University of Goettingen, Goettingen, Germany.) doi: <a href="http://dx.doi.org/10.1016/j.gfs.2019.100341">http://dx.doi.org/10.1016/j.gfs.2019.100341</a>                                                                                                                                                                                                                                                                                            |
| 24. Downs SM, Glass S, Linn KK, et al. The interface between consumers and their food environment in Myanmar: an exploratory mixed-methods study. <i>Public Health Nutrition</i> 2019;22(6):1075-88. doi: 10.1017/S1368980018003427                                                                                                                                                                                                                                                                                                                                                                                                                        |
| 25. Du WW, Su C, Wang HJ, et al. Food environment characteristics and health implication among chinese adults. <i>Annals of Nutrition and Metabolism</i> 2013;63(SUPPL. 1):958. doi: <a href="http://dx.doi.org/10.1159/000354245">http://dx.doi.org/10.1159/000354245</a>                                                                                                                                                                                                                                                                                                                                                                                 |
| 26. Duran AC, Ricardo CZ, Mais LA, et al. Conflicting Messages on Food and Beverage Packages: Front-of-Package Nutritional Labeling, Health and Nutrition Claims in Brazil. <i>Nutrients</i> 2019;11(12):2967-67. doi: 10.3390/nu11122967                                                                                                                                                                                                                                                                                                                                                                                                                  |
| 27. Elorriaga N, Gutierrez L, Chaparro RM, et al. PERCEPTIONS OF PRICE AND STORE AVAILABILITY OF FRUIT AND VEGETABLE AND THEIR ASSOCIATIONS WITH FRUIT AND VEGETABLE INTAKE AMONG ADULTS IN FOUR SOUTH AMERICAN CITIES. <i>Annals of Nutrition &amp; Metabolism</i> 2017;71:817.                                                                                                                                                                                                                                                                                                                                                                           |
| 28. Estima CCP, Bruening M, Hannan PJ, et al. A cross-cultural comparison of eating behaviors and home food environmental factors in adolescents from Sao Paulo (Brazil) and Saint Paul-Minneapolis (US). <i>Journal of nutrition education and behavior</i> 2014;46(5):370-5. doi: <a href="https://dx.doi.org/10.1016/j.jneb.2014.01.007">https://dx.doi.org/10.1016/j.jneb.2014.01.007</a>                                                                                                                                                                                                                                                              |
| 29. Ferguson EL, Watson L, Berger J, et al. Realistic Food-Based Approaches Alone May Not Ensure Dietary Adequacy for Women and Young Children in South-East Asia. <i>Maternal &amp; Child Health Journal</i> ;23(1):55-66. doi: 10.1007/s10995-018-2638-3                                                                                                                                                                                                                                                                                                                                                                                                 |
| 30. Ferretti F, Mariani M. Sugar-sweetened beverage affordability and the prevalence of overweight and obesity in a cross section of countries. <i>Globalization and Health</i> 2019;15(1):30. doi: <a href="http://dx.doi.org/10.1186/s12992-019-0474-x">http://dx.doi.org/10.1186/s12992-019-0474-x</a>                                                                                                                                                                                                                                                                                                                                                  |
| 31. Fuster M, Colón-Ramos U. Changing Places, Changing Plates? A Binational Comparison of Barriers and Facilitators to Healthful Eating Among Central American Communities. <i>Journal of Immigrant &amp; Minority Health</i> 2018;20(3):705-10. doi: 10.1007/s10903-017-0588-2                                                                                                                                                                                                                                                                                                                                                                            |
| 32. Gans KM, Gorham G, Risica PM, et al. A multi-level intervention in subsidized housing sites to increase fruit and vegetable access and intake: Rationale, design and methods of the 'Live Well, Viva Bien' cluster randomized trial. <i>BMC public health</i> 2016;16 (Gans, Gorham, Risica, Dulin-Keita, Dionne, Gao, Peters) Institute for Community Health Promotion, Brown University School of Public Health, Providence, RI, 02912, USA(Gans) Department of Human Development and Family Studies and Center for Health Interven):521. doi: <a href="http://dx.doi.org/10.1186/s12889-016-3141-7">http://dx.doi.org/10.1186/s12889-016-3141-7</a> |
| 33. Gartin M. Residence in a deprived urban food environment: Food access, affordability, and quality in a Paraguayan food desert. <i>Dissertation Abstracts International: Section B: The Sciences and Engineering</i> 2013;74(1-B(E)):No-Specified.                                                                                                                                                                                                                                                                                                                                                                                                      |



|                                                                                                                                                                                                                                                                                                                                                                                               |
|-----------------------------------------------------------------------------------------------------------------------------------------------------------------------------------------------------------------------------------------------------------------------------------------------------------------------------------------------------------------------------------------------|
| 34. Ghosh-Jerath S, Singh A, Magsumbol MS, et al. Contribution of indigenous foods towards nutrient intakes and nutritional status of women in the Santhal tribal community of Jharkhand, India. <i>Public Health Nutrition</i> 2016;19(12):2256-67. doi: 10.1017/S1368980016000318                                                                                                           |
| 35. Godin KM, Chacón V, Barnoya J, et al. The school environment and sugar-sweetened beverage consumption among Guatemalan adolescents. <i>Public Health Nutrition</i> 2017;20(16):2980-87. doi: 10.1017/S1368980017001926                                                                                                                                                                    |
| 36. Gorgulho BM, Previdelli AN, Marchioni DML. Effects of an intervention in the workplace food environment. <i>Nutrition &amp; Food Science</i> 2012;42(3):156-63. doi: <a href="http://dx.doi.org/10.1108/00346651211228441">http://dx.doi.org/10.1108/00346651211228441</a>                                                                                                                |
| 37. Goudet SM, Faiz S, Bogin BA, et al. Pregnant Women's and Community Health Workers' Perceptions of Root Causes of Malnutrition Among Infants and Young Children in the Slums of Dhaka, Bangladesh. <i>American Journal of Public Health</i> 2011;101(7):1225-33. doi: 10.2105/AJPH.2010.300090                                                                                             |
| 38. Guo CL, Zhang B, Wang HJ, et al. A Scan of Obesogenic Environments and a Spatial Inference of Obesity Prevalence in Chinese Children and Adolescents: Based on the Chinese Health and Nutrition Survey 2011 Data. <i>Biomedical and environmental sciences : BES</i> 2018;31(10):729-39. doi: <a href="https://dx.doi.org/10.3967/bes2018.098">https://dx.doi.org/10.3967/bes2018.098</a> |
| 39. Hayati Adilin MAM, Holdsworth M, McCullough P, et al. Whole School Mapping to Investigate the School Environment's Potential to Promote a Healthy Diet and Physical Activity in Malaysia. <i>Malaysian Journal of Nutrition</i> 2015;21(1):1-14.                                                                                                                                          |
| 40. Ho S, Wong Y, Lo W, et al. Neighbourhood food environment and dietary intakes in adolescents: sex and perceived family affluence as moderators. <i>International Journal of Pediatric Obesity</i> 2010;5(5):420-27. doi: <a href="http://dx.doi.org/10.3109/17477160903505910">http://dx.doi.org/10.3109/17477160903505910</a>                                                            |
| 41. Hsiao BS, Sibeko L, Wicks K, et al. Mobile produce market influences access to fruits and vegetables in an urban environment. <i>Public health nutrition</i> 2018;21(7):1332-44. doi: <a href="http://dx.doi.org/10.1017/S1368980017003755">http://dx.doi.org/10.1017/S1368980017003755</a>                                                                                               |
| 42. Hua J. Smartphone-based assessment of food environment, diet and obesity risk. <i>Dissertation Abstracts International: Section B: The Sciences and Engineering</i> 2018;78(7-B(E)):No-Specified.                                                                                                                                                                                         |
| 43. Huey TC, Siew CY, Ying LP, et al. Impact of a school nutrition program (SNP) in Malaysia. <i>Annals of Nutrition and Metabolism</i> 2019;75(3):366-67. doi: <a href="http://dx.doi.org/10.1159/000501751">http://dx.doi.org/10.1159/000501751</a>                                                                                                                                         |
| 44. Inglis V, Ball K, Crawford D. Socioeconomic variations in women's diets: what is the role of perceptions of the local food environment? <i>Journal of epidemiology and community health</i> 2008;62(3):191-7. doi: <a href="https://dx.doi.org/10.1136/jech.2006.059253">https://dx.doi.org/10.1136/jech.2006.059253</a>                                                                  |
| 45. Isoldi KK, Dalton S. Calories in the classroom: celebration foods offered and consumed during classroom parties at an elementary school in a low-income, urban community. <i>Childhood obesity (Print)</i> 2012;8(4):378-83. doi: <a href="https://dx.doi.org/10.1089/chi.2012.0002">https://dx.doi.org/10.1089/chi.2012.0002</a>                                                         |
| 46. Ji CY, Cheng TO. Prevalence and geographic distribution of childhood obesity in China in 2005. <i>International Journal of Cardiology</i> 2008;131(1):1-8. doi: <a href="http://dx.doi.org/10.1016/j.ijcard.2008.05.078">http://dx.doi.org/10.1016/j.ijcard.2008.05.078</a>                                                                                                               |
| 47. Jing S, Li H, Ruopeng A. Food environment and its relation to diet behavior and obesity in China. <i>Chinese Journal of Endemiology</i> 2019;40(10):1296-303. doi: <a href="http://dx.doi.org/10.3760/cma.j.issn.0254-6450.2019.10.023">http://dx.doi.org/10.3760/cma.j.issn.0254-6450.2019.10.023</a>                                                                                    |
| 48. Karupaiah T, Swee WCS, Liew SY, et al. Dietary health behaviors of women living in high rise dwellings: a case study of an urban community in Malaysia. <i>Journal of community health</i> 2013;38(1):163-71. doi: <a href="https://dx.doi.org/10.1007/s10900-012-9597-1">https://dx.doi.org/10.1007/s10900-012-9597-1</a>                                                                |
| 49. Kelman J, Pool LR, Gordon-Larsen P, et al. Associations of unhealthy food environment with the development of coronary artery calcification: The CARDIA Study. <i>Journal of the American Heart Association</i> 2019;8(4):e010586. doi: <a href="http://dx.doi.org/10.1161/JAHA.118.010586">http://dx.doi.org/10.1161/JAHA.118.010586</a>                                                 |
| 50. Khonje MG, Ecker O, Qaim M. Effects of Modern Food Retailers on Adult and Child Diets and Nutrition. <i>Nutrients</i> 2020;12(6):1714. doi: 10.3390/nu12061714                                                                                                                                                                                                                            |
| 51. Khonje MG, Qaim M. Modernization of African Food Retailing and (Un)healthy Food Consumption. <i>Sustainability</i> 2019;11(16):18. doi: 10.3390/su11164306                                                                                                                                                                                                                                |



|                                                                                                                                                                                                                                                                                                                                                                              |
|------------------------------------------------------------------------------------------------------------------------------------------------------------------------------------------------------------------------------------------------------------------------------------------------------------------------------------------------------------------------------|
| 52. Kroll F, Swart EC, Annan RA, et al. Mappobesogenic food environments in South Africa and Ghana: Correlations and contradictions. <i>Sustainability</i> 2019;11(14) doi: 10.3390/su11143924                                                                                                                                                                               |
| 53. Kuuire VZ, Bisung E, Were JM. Examining the connection between residential histories and obesity among Ghanaians: evidence from a national survey. <i>Journal of Public Health (09431853)</i> 2019;27(5):569-79. doi: 10.1007/s10389-018-0983-8                                                                                                                          |
| 54. Langellier BA, Garza JR, Prelip ML, et al. Corner Store Inventories, Purchases, and Strategies for Intervention: A Review of the Literature. <i>Californian Journal of Health Promotion</i> 2013;11(3):1-13. doi: 10.32398/cjhp.v11i3.1537                                                                                                                               |
| 55. Lava MdP, Antun MC, Ruggiero Md, et al. Perception of users with excess of weight upon the factors that intervene in the implementation of the dietary guidelines suggested in the Nutritional Counseling of the Healthy Stations Program in the City of Buenos Aires. <i>Diaeta</i> 2018;36(164):8-19.                                                                  |
| 56. Lee RM, Rothstein JD, Gergen J, et al. Process Evaluation of a Comprehensive Supermarket Intervention in a Low-Income Baltimore Community. <i>Health promotion practice</i> 2015;16(6):849-58. doi: <a href="https://dx.doi.org/10.1177/1524839915599359">https://dx.doi.org/10.1177/1524839915599359</a>                                                                |
| 57. Lee SYR. Characteristics of western dietary pattern and its association with media exposure in two generations of Hong Kong Chinese women. <i>Dissertation Abstracts International: Section B: The Sciences and Engineering</i> 2012;73(2-B):917.                                                                                                                        |
| 58. Li Y, Mallinson PAC, Bhan N, et al. Neighborhood physical food environment and cardiovascular risk factors in India: Cross-sectional evidence from APCAPS. <i>Environ Int</i> 2019;132:105108. doi: 10.1016/j.envint.2019.105108 [published Online First: 2019/09/02]                                                                                                    |
| 59. Lopes MS, Caiaffa WT, Andrade ACS, et al. Disparities in food consumption between economically segregated urban neighbourhoods. <i>Public health nutrition</i> 2020;23(3):525-37. doi: <a href="http://dx.doi.org/10.1017/S1368980019003501">http://dx.doi.org/10.1017/S1368980019003501</a>                                                                             |
| 60. MacKeown JM, Faber M, MacKeown JM, et al. Urbanisation and cariogenic food habits among 4-24-month-old black South African children in rural and urban areas. <i>Public Health Nutrition</i> 2002;5(6):719-26.                                                                                                                                                           |
| 61. Martinez-Ospina A, Sudfeld CR, González SA, et al. School Food Environment, Food Consumption, and Indicators of Adiposity Among Students 7-14 Years in Bogotá, Colombia. <i>Journal of School Health</i> 2019;89(3):200-09. doi: 10.1111/josh.12729                                                                                                                      |
| 62. Martins P, Vedovato G, Oliveira M. Availability of ultra-processed food in the neighborhood is related to BMI in women living in an urban area of Brazil. <i>Annals of Nutrition and Metabolism</i> 2013;63(SUPPL. 1):1111. doi: <a href="http://dx.doi.org/10.1159/000354245">http://dx.doi.org/10.1159/000354245</a>                                                   |
| 63. Martins PA, De Carvalho Cremm E, De Oliveira MA, et al. Food availability is related to body mass index of children in an urban area of Brazil. <i>FASEB Journal</i> 2012;26(Meeting Abstracts)                                                                                                                                                                          |
| 64. Maziero CCS, Jaime PC, Duran AC. The influence of meal and food markets in fruit and vegetable consumption among adults in the city of Sao Paulo. <i>Revista brasileira de epidemiologia = Brazilian journal of epidemiology</i> 2017;20(4):611-23. doi: <a href="https://dx.doi.org/10.1590/1980-5497201700040005">https://dx.doi.org/10.1590/1980-5497201700040005</a> |
| 65. Mendes LL, Velasquez-Melendez G, Matozinhos FP, et al. Number of restaurants and obesity among Brazilian adults: A multilevel analysis. <i>Annals of Nutrition and Metabolism</i> 2015;67(SUPPL. 1):378. doi: <a href="http://dx.doi.org/10.1159/000440895">http://dx.doi.org/10.1159/000440895</a>                                                                      |
| 66. Menger-Ogle AD, Graham DJ. The influence of front-of-package nutrition claims on food perceptions and purchase intentions among Nepali consumers. <i>Food Quality and Preference</i> 2018;66:160-70. doi: 10.1016/j.foodqual.2017.12.017                                                                                                                                 |
| 67. Milhassi Vedovato G, Helena Pereira Nunes H, Gobetti Leonardi F, et al. Rethinking food systems and food choices through community garden participation: Lessons from a university setting in Brazil. <i>Annals of Nutrition and Metabolism</i> 2017;71(Supplement 2):688. doi: <a href="http://dx.doi.org/10.1159/000480486">http://dx.doi.org/10.1159/000480486</a>    |
| 68. Missbach B, König J, Wansink B. Foreign weight: New food environments as weight change estimates for expats. <i>FASEB Journal</i> 2017;31(1 Supplement 1)                                                                                                                                                                                                                |

|                                                                                                                                                                                                                                                                                                                                                                                                                                                                                                                                                                      |
|----------------------------------------------------------------------------------------------------------------------------------------------------------------------------------------------------------------------------------------------------------------------------------------------------------------------------------------------------------------------------------------------------------------------------------------------------------------------------------------------------------------------------------------------------------------------|
| 69. Monge-Rojas R, Garita C, Sánchez M, et al. Barriers to and motivators for healthful eating as perceived by rural and urban Costa Rican adolescents. <i>Journal of Nutrition Education &amp; Behavior</i> 2005;37(1):33-40. doi: 10.1016/s1499-4046(06)60257-1                                                                                                                                                                                                                                                                                                    |
| 70. Moubarac J-C, Claro RM, Baraldi LG, et al. International differences in cost and consumption of ready-to-consume food and drink products: United Kingdom and Brazil, 2008–2009. <i>Global Public Health</i> 2013;8(7):845-56. doi: 10.1080/17441692.2013.796401                                                                                                                                                                                                                                                                                                  |
| 71. Navarro AC, Velez M-IO. Obesogenic Environment Case Study from a Food and Nutrition Security Perspective: Hermosillo City. <i>International journal of environmental research and public health</i> 2019;16(3) doi: <a href="https://dx.doi.org/10.3390/ijerph16030407">https://dx.doi.org/10.3390/ijerph16030407</a>                                                                                                                                                                                                                                            |
| 72. Neha R, Riddell L, Worsley A. Indian adolescents' perceptions of the home food environment. <i>BMC Public Health</i> 2018;18(169)                                                                                                                                                                                                                                                                                                                                                                                                                                |
| 73. Ng SH, Kelly B, Se CH, et al. Reading the mind of children in response to food advertising: a cross-sectional study of Malaysian schoolchildren's attitudes towards food and beverages advertising on television. <i>BMC public health</i> 2015;15(100968562):1047. doi: <a href="https://dx.doi.org/10.1186/s12889-015-2392-z">https://dx.doi.org/10.1186/s12889-015-2392-z</a>                                                                                                                                                                                 |
| 74. Ogle AD. The impact of front-of-pack nutrition claims on urban Nepali consumers' food choice processes. <i>Dissertation Abstracts International: Section B: The Sciences and Engineering</i> 2017;77(12-B(E)):No-Specified.                                                                                                                                                                                                                                                                                                                                      |
| 75. Patel O, Shahulhameed S, Shivashankar R, et al. Association between full service and fast food restaurant density, dietary intake and overweight/obesity among adults in Delhi, India. <i>BMC Public Health</i> 2017;17:1-11. doi: 10.1186/s12889-017-4598-8                                                                                                                                                                                                                                                                                                     |
| 76. Pehlke EL, Letona P, Hurley K, et al. Guatemalan school food environment: impact on schoolchildren's risk of both undernutrition and overweight/obesity. <i>Health Promotion International</i> 2016;31(3):542-50. doi: 10.1093/heapro/dav011                                                                                                                                                                                                                                                                                                                     |
| 77. Pehlke EL, Letona P, Ramirez-Zea M, et al. Healthy casetas: A potential strategy to improve the food environment in low-income schools to reduce obesity in children in Guatemala City. <i>Ecology of food and nutrition</i> 2016;55(3):324-38. doi: <a href="https://dx.doi.org/10.1080/03670244.2016.1161618">https://dx.doi.org/10.1080/03670244.2016.1161618</a>                                                                                                                                                                                             |
| 78. Pera MF, Katz BNH, Bentley ME. Dietary Diversity, Food Security, and Body Image among Women and Children on San Cristobal Island, Galapagos. <i>Maternal &amp; Child Health Journal</i> 2019;23(6):830-38. doi: 10.1007/s10995-018-02701-4                                                                                                                                                                                                                                                                                                                       |
| 79. Pessoa C, Mendes L, Caiaffa T, et al. Availability of food stores and consumption of fruit, legumes and vegetables in a Brazilian urban area. <i>Nutricion hospitalaria</i> 2014;31(3):1438-43. doi: <a href="https://dx.doi.org/10.3305/nh.2015.31.3.8245">https://dx.doi.org/10.3305/nh.2015.31.3.8245</a>                                                                                                                                                                                                                                                     |
| 80. Pessoa MC, Mendes LL, Padez CMP, et al. Food environment and fruit and vegetable intake among adults in Brazilian population. <i>European Journal of Epidemiology</i> 2012;27(1 SUPPL. 1):S126. doi: <a href="http://dx.doi.org/10.1007/s10654-012-9722-6">http://dx.doi.org/10.1007/s10654-012-9722-6</a>                                                                                                                                                                                                                                                       |
| 81. Peyton S, Moseley WG, Battersby J, et al. Implications of supermarket expansion on urban food security in Cape Town, South Africa. Abingdon: Routledge 2016.                                                                                                                                                                                                                                                                                                                                                                                                     |
| 82. Pradeilles R, Griffiths P, Rousham E, et al. Community socio-economic status influences on dietary intake in south african adolescents living in an urban area. <i>Annals of Nutrition and Metabolism</i> 2013;63(SUPPL. 1):947. doi: <a href="http://dx.doi.org/10.1159/000354245">http://dx.doi.org/10.1159/000354245</a>                                                                                                                                                                                                                                      |
| 83. Prasetyaningrum YI, Kertia N, Gunawan IMA. Impact of parental obesity, food availability, and dietary intake on preschool children obesity: A case-control study. <i>Annals of Nutrition and Metabolism</i> 2019;75(3):374. doi: <a href="http://dx.doi.org/10.1159/000501751">http://dx.doi.org/10.1159/000501751</a>                                                                                                                                                                                                                                           |
| 84. Pioreschi A, Wrottesley SV, Norris SA. Physical Activity Levels, Food Insecurity and Dietary Behaviours in Women from Soweto, South Africa. <i>Journal of community health</i> 2020((Pioreschi, Wrottesley, Norris) SAMRC/Wits Developmental Pathways for Health Research Unit, Department of Paediatrics, Faculty of Health Sciences, University of the Witwatersrand, Johannesburg, South Africa(Norris) Institute for Developmental Science and) doi: <a href="http://dx.doi.org/10.1007/s10900-020-00861-5">http://dx.doi.org/10.1007/s10900-020-00861-5</a> |

|                                                                                                                                                                                                                                                                                                                                                                                                                                                                                                                                                                                                                                                   |
|---------------------------------------------------------------------------------------------------------------------------------------------------------------------------------------------------------------------------------------------------------------------------------------------------------------------------------------------------------------------------------------------------------------------------------------------------------------------------------------------------------------------------------------------------------------------------------------------------------------------------------------------------|
| 85. Raaijmakers I, Snoek H, Maziya-Dixon B, et al. Drivers of Vegetable Consumption in Urban Nigeria: Food Choice Motives, Knowledge, and Self-Efficacy. <i>Sustainability</i> 2018;10(12):14. doi: 10.3390/su10124771                                                                                                                                                                                                                                                                                                                                                                                                                            |
| 86. Rautela YS, Reddy BV, Singh AK, et al. The prevalence of obesity among adult population and its association with food outlet density in a hilly area of Uttarakhand. <i>Journal of Family Medicine and Primary Care</i> 2018;7(4):809-14. doi: <a href="http://dx.doi.org/10.4103/jfmpc.jfmpc_161_17">http://dx.doi.org/10.4103/jfmpc.jfmpc_161_17</a>                                                                                                                                                                                                                                                                                        |
| 87. Reyes-Garcia V, Powell B, Diaz-Reviriego I, et al. Dietary transitions among three contemporary hunter-gatherers across the tropics. <i>Food Security</i> 2019;11(1):109-22. doi: 10.1007/s12571-018-0882-4                                                                                                                                                                                                                                                                                                                                                                                                                                   |
| 88. Riley L, Henry C, Ramdath D. Mapping the school food environment in Dominica. <i>West Indian Medical Journal</i> 2016;65(Supplement 3):47.                                                                                                                                                                                                                                                                                                                                                                                                                                                                                                    |
| 89. Rischke R, Kimenju SC, Klasen S, et al. Supermarkets and food consumption patterns: The case of small towns in Kenya. <i>Food Policy</i> 2015;52:9-21. doi: <a href="https://doi.org/10.1016/j.foodpol.2015.02.001">https://doi.org/10.1016/j.foodpol.2015.02.001</a>                                                                                                                                                                                                                                                                                                                                                                         |
| 90. Rosinger A, Tanner S, Leonard WR. Precursors to overnutrition: the effects of household market food expenditures on measures of body composition among Tsimane' adults in lowland Bolivia. <i>Social Science &amp; Medicine</i> 2013;92(Department of Anthropology, University of Georgia, 250A Baldwin, Jackson St., Athens, GA 30602, USA.):53-60. doi: <a href="http://dx.doi.org/10.1016/j.socscimed.2013.05.022">http://dx.doi.org/10.1016/j.socscimed.2013.05.022</a>                                                                                                                                                                   |
| 91. Safdie M, Jennings-Aburto N, Levesque L, et al. Impact of a school-based intervention program on obesity risk factors in Mexican children. <i>Salud publica de Mexico</i> 2013;55(Supplement 3):374-87.                                                                                                                                                                                                                                                                                                                                                                                                                                       |
| 92. Sarki M, Robertson A, Parlesak A. Association between socioeconomic status of mothers, food security, food safety practices and the double burden of malnutrition in the Lalitpur district, Nepal. <i>Archives of Public Health</i> 2016;74(1):35-35. doi: 10.1186/s13690-016-0150-z                                                                                                                                                                                                                                                                                                                                                          |
| 93. Sato PDM, Couto MT, Wells J, et al. Mothers' food choices and consumption of ultra-processed foods in the Brazilian Amazon: A grounded theory study. <i>Appetite</i> 2020;148((Sato, Cardoso, Scagliusi) Department of Nutrition, School of Public Health, University of Sao Paulo, Avenida Doutor Arnaldo 715, Sao Paulo 01246-904, Brazil(Couto) Department of Preventive Medicine, Medical School, University of Sao Paulo, Avenida Doutor):104602. doi: <a href="http://dx.doi.org/10.1016/j.appet.2020.104602">http://dx.doi.org/10.1016/j.appet.2020.104602</a>                                                                         |
| 94. Shaikh NI, Guo B, Narayan KMV, et al. Eating behaviors of adolescents in new versus established urban centers in South India. <i>FASEB Journal</i> 2017;31(1 Supplement 1)                                                                                                                                                                                                                                                                                                                                                                                                                                                                    |
| 95. Sharkey JR, Dean WR, Johnson CM. Association of household and community characteristics with adult and child food insecurity among Mexican-origin households in colonias along the Texas-Mexico border. <i>International Journal for Equity in Health</i> 2011;10((Sharkey, Dean, Johnson) Program for Research in Nutrition and Health Disparities, School of Rural Public Health, College Station, TX, United States(Sharkey, Dean, Johnson) Texas Nutrition and Obesity Policy Research and Evaluation Network Collaborating C):19. doi: <a href="http://dx.doi.org/10.1186/1475-9276-10-19">http://dx.doi.org/10.1186/1475-9276-10-19</a> |
| 96. Si Z, Scott S, McCordic C. Wet Markets, Supermarkets and Alternative Food Sources: Consumers' Food Access in Nanjing, China. <i>Canadian Journal of Development Studies</i> 2019;40(1):78-96.                                                                                                                                                                                                                                                                                                                                                                                                                                                 |
| 97. Sirasa F. Factors influencing the food choices of urban Sri Lankan preschool children: focus groups with parents and caregivers. <i>Appetite</i> 2020;150(Public Health, School of Medicine, Griffith University, Gold Coast, QLD, 4222, Australia.) doi: <a href="http://dx.doi.org/10.1016/j.appet.2020.104649">http://dx.doi.org/10.1016/j.appet.2020.104649</a>                                                                                                                                                                                                                                                                           |
| 98. Sirasa F, Mitchell L, Silva R, et al. Factors influencing the food choices of urban Sri Lankan preschool children: Focus groups with parents and caregivers. <i>Appetite</i> 2020;150:N.PAG-N.PAG. doi: 10.1016/j.appet.2020.104649                                                                                                                                                                                                                                                                                                                                                                                                           |
| 99. Sparling TM, Waid JL, Wendt AS, et al. Depression among women of reproductive age in rural Bangladesh is linked to food security, diets and nutrition. <i>Public Health Nutrition</i> 2020;23(3):660-73. doi: 10.1017/S1368980019003495                                                                                                                                                                                                                                                                                                                                                                                                       |
| 100. Spires M, Delobelle P, Berggreen-Clausen A, et al. Assessment and perception of urban and rural food environments in South Africa. <i>Transactions of the Royal Society of Tropical Medicine and Hygiene</i> 2019;113(Supplement 1):S138-S39. doi: <a href="http://dx.doi.org/10.1093/trstmh/trz090">http://dx.doi.org/10.1093/trstmh/trz090</a>                                                                                                                                                                                                                                                                                             |

|                                                                                                                                                                                                                                                                                                                                           |
|-------------------------------------------------------------------------------------------------------------------------------------------------------------------------------------------------------------------------------------------------------------------------------------------------------------------------------------------|
| 101. Taber DR, Chriqui JF, Perna FM. Longitudinal association between state policies governing the school food environment and within-student weight change. <i>Obesity</i> 2011;19(SUPPL. 1):S59-S60. doi: <a href="http://dx.doi.org/10.1038/oby.2011.222">http://dx.doi.org/10.1038/oby.2011.222</a>                                   |
| 102. Vedovato GM, Oliveira MA, Martins PA. Inequalities in the availability of food stores and food acquisition pattern of families living in urban areas of Santos, Brazil. <i>Annals of Nutrition and Metabolism</i> 2013;63(SUPPL. 1):1002. doi: <a href="http://dx.doi.org/10.1159/000354245">http://dx.doi.org/10.1159/000354245</a> |
| 103. Vepsäläinen H, Mikkilä V, Erkkola M, et al. Association between home and school food environments and dietary patterns among 9-11-year-old children in 12 countries. <i>International journal of obesity supplements</i> 2015;5(Suppl 2):S66-S73. doi: 10.1038/ijosup.2015.22                                                        |
| 104. Vericker TC. Children's school-related food and physical activity behaviors are associated with body mass index. <i>Journal of the Academy of Nutrition and Dietetics</i> 2014;114(2):250-56. doi: <a href="http://dx.doi.org/10.1016/j.jand.2013.07.046">http://dx.doi.org/10.1016/j.jand.2013.07.046</a>                           |
| 105. Vilchis-Gil J, Galván-Portillo M, Klünder-Klünder M, et al. Food habits, physical activities and sedentary lifestyles of eutrophic and obese school children: a case-control study. <i>BMC Public Health</i> 2015;15(1):124-24. doi: 10.1186/s12889-015-1491-1                                                                       |
| 106. Webb MF, Chary AN, De Vries TT, et al. Exploring mechanisms of food insecurity in indigenous agricultural communities in Guatemala: A mixed methods study. <i>BMC Nutr</i> 2016;2(1) doi: 10.1186/s40795-016-0091-5                                                                                                                  |
| 107. Yang W, Hong X, Huijun W, et al. The impact of urbanization on the community food environment in China. <i>Asia Pacific Journal of Clinical Nutrition</i> 2017;26(3):504-13. doi: 10.6133/apjcn.032016.09                                                                                                                            |
| 108. Yayan EH, Çelebioğlu A. Effect of an obesogenic environment and health behaviour-related social support on body mass index and body image of adolescents. <i>Global Health Promotion</i> 2018;25(3):33-42. doi: 10.1177/1757975916675125                                                                                             |
| 109. Zhang J, Wang HJ, Wang ZH, et al. Influence of proximities to food outlets on daily energy intake among Chinese adults, evidence from china health and nutrition survey, 2009-2011. <i>Obesity Reviews</i> 2016;17(SUPPL. 2):159. doi: <a href="http://dx.doi.org/10.1111/obr.12403">http://dx.doi.org/10.1111/obr.12403</a>         |
| 110. Zhang T, Huang B. Local retail food environment and consumption of fruit and vegetable among adults in Hong Kong. <i>International Journal of Environmental Research and Public Health</i> 2018;15(10):2247. doi: <a href="http://dx.doi.org/10.3390/ijerph15102247">http://dx.doi.org/10.3390/ijerph15102247</a>                    |
| 111. Zheng D, Liu Z, Zhang J. Community-based intervention for obesity in infants and preschool children. <i>Maternal and Child Health Care of China</i> 2011;26(26):4037-39.                                                                                                                                                             |
| 112. Zuccolotto DCC, Bertola MR, Isobe MT, et al. Reproducibility of a questionnaire about perceived food environment and produce intake by pregnant women. <i>Revista de Nutricao</i> 2013;26(6):727-35. doi: <a href="http://dx.doi.org/10.1590/S1415-52732013000600011">http://dx.doi.org/10.1590/S1415-52732013000600011</a>          |
